# Supplementary material
Source: PubMed Central journal article supplement (PMC4280302)
Supplement: NIHMS622664-supplement-Supp_Material.pdf [file NIHMS622664-supplement-Supp_Material.pdf]

***Fatty Acid Desaturase 1 (FADS1) Gene Polymorphisms Control Human Hepatic Lipid Composition***

Libo Wang<sup>1\*</sup>, Shaminie Athinarayanan<sup>2\*</sup>, Guanglong Jiang<sup>3</sup>, Naga Chalasani<sup>4</sup>,  
Min Zhang<sup>1,5</sup>, Wanqing Liu<sup>2</sup>

<sup>1</sup>Department of Statistics, College of Science, and <sup>2</sup>Department of Medicinal Chemistry and Molecular Pharmacology, College of Pharmacy, Purdue University, West Lafayette, IN 47907; <sup>3</sup>Department of Medical and Molecular Genetics, and <sup>4</sup>Division of Gastroenterology and Hepatology, Indiana University School of Medicine, Indianapolis, IN 46202; <sup>5</sup>Beijing Institute for Brain Disorders, Capital Medical University, Beijing 100069, P. R. China.

\*LW and AS contributed equally to the study.

Corresponding author:

Wanqing Liu, Ph.D.,

Department of Medicinal Chemistry and Molecular Pharmacology, Purdue University.

RHPH 224B, 575 Stadium Mall Drive, West Lafayette, IN 47907

Phone: (765) 494-6389

Fax: 765-494-1414

Email: liu781@purdue.edu

## Methods and Materials

### *Lipidomic Analysis*

Targeted lipidomic analysis of 357 lipids (**Table S2**) was conducted using an automated electrospray ionization (ESI)-tandem mass spectrometry approach according to a protocol described previously (Kilaru et al., 2010). Data acquisition was performed based on a modified procedure by Devaiah et al. (Devaiah et al., 2006). Briefly, hepatic lipid extracts were dissolved in chloroform/methanol (9:1) prior to analysis. Precise amounts of internal standards for various PCs, lysoPCs, PEs, lysoPEs, PAs, (phytanoyl) PAs, PSs, (phytanoyl) PSs and PIs were added. A triple quadrupole MS/MS system (API 4000, Applied Biosystems, Foster City, CA) was used to acquire mass spectra. Unfractionated samples were introduced by continuous infusion into the Turbo V ESI source using an autosampler (LC Mini PAL, CTC Analytics AG, Zwingen, Switzerland) fitted with the required injection loop for the acquisition time. A series of spectra were produced by sequential precursor and neutral loss scans of the extracts produced, with each spectrum revealing a set of lipid species containing a common head group fragment. Positive mode was used to detect lipid species.

After mass spectrometry analysis, the data were then smoothed, and the background of each spectrum was subtracted. The peaks were further centroided and integrated using custom script and Applied Biosystems Analyst software. Peaks for the target lipids in these spectra were then identified, followed by data correction for isotopic overlap, and molar amounts calculation by comparing to

the internal standards in the same lipid class. To correct for chemical or instrumental noise, a sample containing only internal standard mixture was also run through the same series of scans, in which the molar amounts of each lipid metabolite detected were subtracted from the molar amounts of each metabolite calculated from the experimental sample spectra. The data were adjusted to account for the fraction of sample analyzed and normalized to the sample total protein content measured as above. Data were reported as nmol or  $\mu$ mol of each detected lipid metabolite/mg protein.

### ***Western Blotting***

Protein samples used for Western blotting were isolated from the liver tissue using AllPrep Extraction Kit (Qiagen, CA, USA). The following antibodies were used: FADS1 (ab126706) and GAPDH (ab37168) from Abcam (Cambridge, MA, USA). The protein extracts concentrations were determined using BCA assay (Thermo Fisher Scientific, Rockford, IL, USA). All protein samples were diluted in loading buffer and heated at 90°C for 10 mins. Samples were then subjected to separation on SDS-PAGE and transferred to polyvinyl difluoride membranes. The membranes were incubated with the specific antibodies and the proteins of interest were detected by species-specific horseradish-peroxidase (HRP)-conjugated immunoglobulin and then visualized using enhanced chemiluminescence (Thermo Fisher Scientific, Rockford, IL, USA). Protein bands were visualized by exposed to the CL-XPosure film (Thermo Fisher Scientific) for 1 min. Films were then scanned and the area density of the protein band was

quantified using ImageJ (Schneider et al., 2012). The FADS1/GAPDH ratios were used for further analysis. Proteins of the HepG2 cell line were loaded on each gel, and the protein ratios in HepG2 cells were used as an internal control to normalize the ratios obtained for each liver sample.

### ***Data Analysis and Statistics***

We performed an integrated analysis to understand the role of *FADS* polymorphisms as well as *FADS* genes in regulating hepatic lipid composition. Tests were focused on: 1) associations between these SNPs and mRNA expression of *FADS* genes (*FADS1*, *FADS2* and *FADS3*), hepatic content of 169 lipid species, 14,196 pair-wise ratios of these lipid species, and total hepatic fat content (HFC); 2) Locus-wide ( $\pm$ 500kb region) mapping of *cis*-eQTLs for *FADS* genes, to evaluate the effect of remaining *cis*-SNPs within the locus; 3) Genome-wide mapping of quantitative trait loci (QTL) for hepatic content of the individual lipids and lipid ratios identified in step 1 to further verify the effects of remaining SNPs among the entire genome. A flowchart describing study design along with key observations is shown in **Fig S2**.

All analyses were conducted using a linear regression model, by assuming the allelic effect to be an additive mode. Prior to QTL mapping, gene expression levels, individual lipid levels and total fat content were log transformed ( $+\log_{10}$ ). Residual variances were calculated by controlling covariates including age, gender, body mass index (BMI), race and alcohol intake status (yes or no). A

conditional analysis was also conducted to test whether the *PNPLA3* gene polymorphism (rs738409) (Romeo et al., 2008) may confound the associations between *FADS* SNPs and individual lipids and HFC.

A total of 464,626 SNPs were included in the genome-wide association analysis, after removing those who have >5% missing rate, minor allele frequency (MAF) <0.05, or failed the Hardy-Weinberg Equilibrium (HWE) test at the threshold 0.001. Bonferroni correction was used to correct the potential multiple testing for each experiment, i.e. the association between 6 SNPs and mRNA levels of 3 *FADS* genes (corrected significance  $p=0.017$ ), between SNPs and the levels of 169 individual lipids (corrected significance  $p=3\times 10^{-4}$ ), between SNPs and 14,196 lipid ratios (corrected significance  $p=3.5\times 10^{-6}$ ), locus-wide eQTL mapping [for 2,177 imputed SNPs (further described below), corrected significance  $p=2.3\times 10^{-5}$ ] and GWAS analyses (464,626 SNPs,  $p=1\times 10^{-7}$ ). Given the high LD levels ( $r^2>0.8$ ) between all 6 SNPs among the *FADS* locus (**Fig S1**),  $p$  values for the associations with these SNPs were not further corrected for these 6 tests.

For locus-wide eQTL mapping, we used both originally genotyped and imputed SNP information within the region (hg19, Chr11: 61,071,142-62,159,006). To further validate the eQTL mapping results, we also conducted a similar mapping in an additional Asian liver eQTL dataset recently published (Wang et al., 2014). Imputed data with 1000 Genome data as a reference in both our dataset and the Asian dataset was performed in the previously published analysis and was kindly

provided by Wang et al. (Wang et al., 2014). The imputed data further underwent a quality control (QC) process by filtering out the SNPs with low imputation quality ( $\leq 30\%$ ) and minor allele frequency ( $< 5\%$ ). After this process, information for 2,177 and 1,619 SNPs respectively in our dataset and the Asian dataset was remained for further analyses.

To further verify the association between SNP genotypes and FADS1 protein levels, the FADS1/GAPDH ratios were log transformed and correlated with the SNP genotype (rs174556 as an example), by using the same model presented above for mRNA analysis.

To further evaluate the causal effect of the six core SNPs and their LD proxies on *FADS1* gene transcription, we performed an enrichment analysis by investigating the distribution of these SNPs in transcription factor binding sites (TFBS) identified in the ENCODE project. We performed this by comparing the number of SNPs located in the TFBS between the SNPs that are in the LD block and those that are not but with a similar MAF ( $\geq 0.25$ ). A Chi-Square test was used and the significance level was set at  $p < 0.05$ .

Statistical analyses were performed using PLINK

(<http://pngu.mgh.harvard.edu/~purcell/plink>) (Purcell et al., 2007) or SAS v9.3 (SAS Institute Inc. NC, USA) and data were plotted using R or Graphpad Prism 6.0 (Graphpad Software, CA, USA).

**Figure Legends**

**Fig S1.** Linkage disequilibrium structure and recombination hotspots across the *FADS* gene locus. Shown here is the LD level ( $r^2$ ) across all SNPs at the locus genotyped in 1000 Genome (Caucasian population, CEU) centered to rs174556.

**Fig S2.** Illustration of the study design.

**Fig S3.** Frequency distribution of hepatic fat content (HFC) in the livers. Showing here is the relative HFC normalized by total protein content.

**Fig S4.** SNP-centric Zoomplot showing LD structure centered at rs174537 and the associations between imputed SNPs across the *FADS* gene locus and A) *FADS1* expression, B) *FADS2* expression and C) *FADS3* expression in our liver samples cohort.

**Fig S5.** SNP-centric Zoomplot showing LD structure centered at rs174537 and the associations between imputed SNPs and A-B) *FADS1* expression as represented by two different probes; C-D) *FADS2* expression represented by two different probes; and E) *FADS3* expression in a set of published Han Chinese liver sample cohort (Wang *et al*, 2014).

Fig S1.

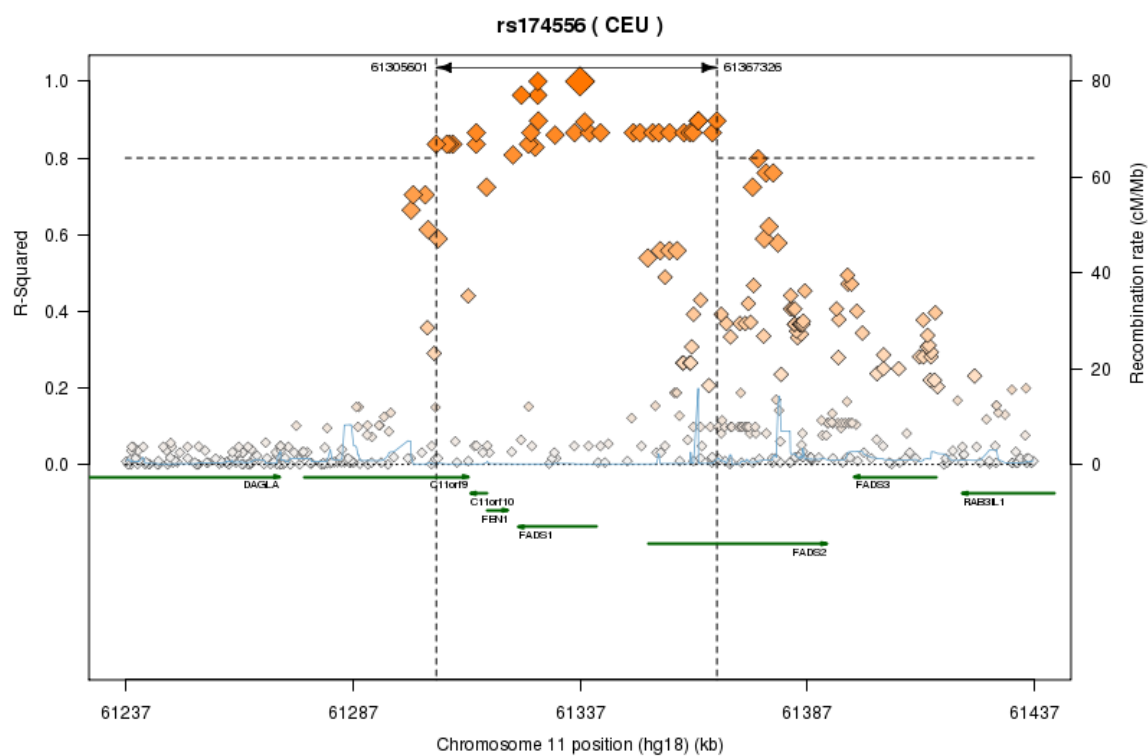



Fig S2

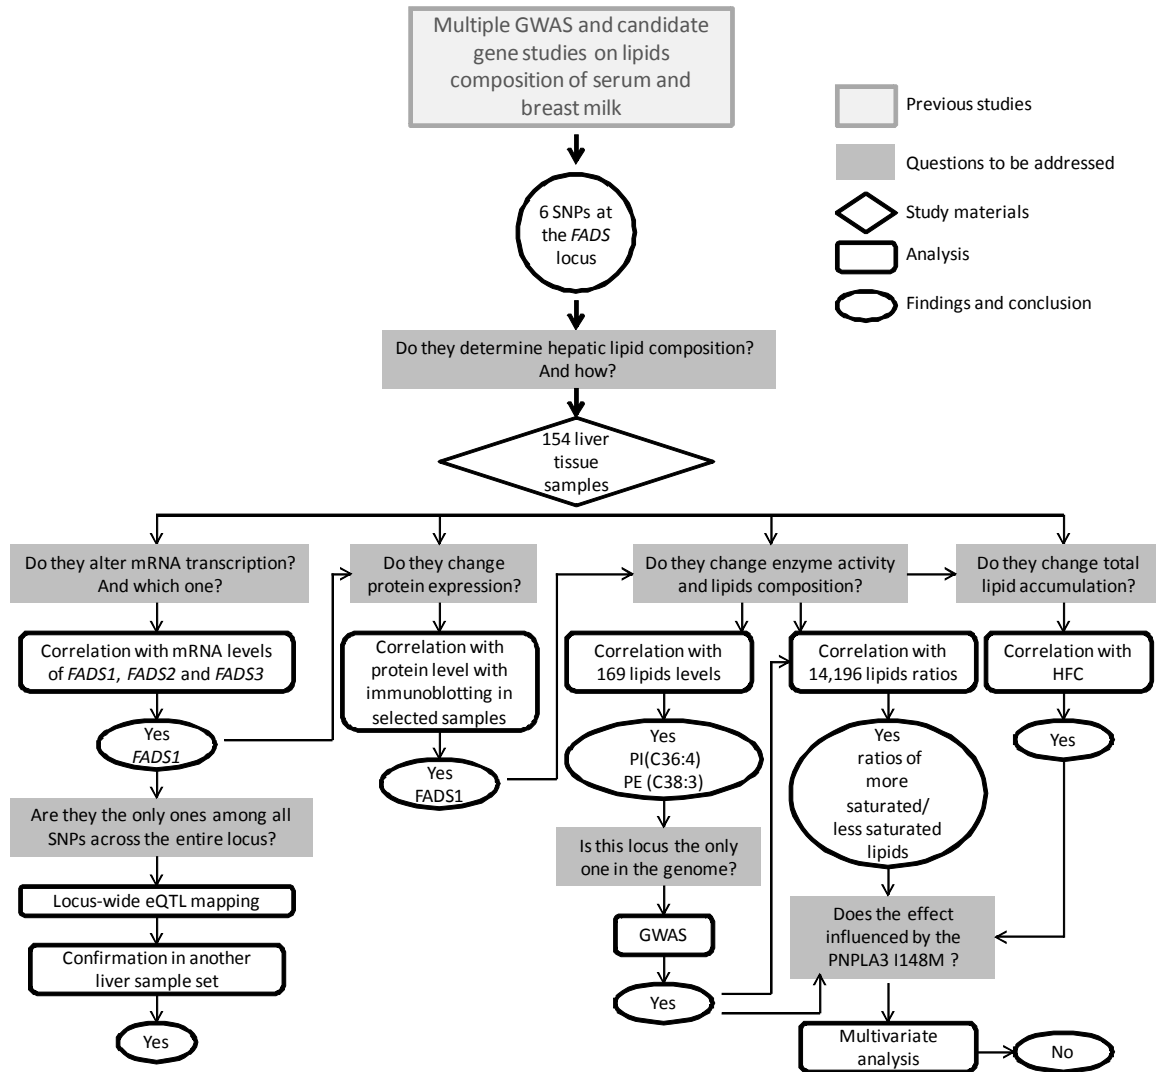

Fig S3.

Number of sample

0.00 0.05 0.10 0.15 0.20 0.25 0.30 0.35 0.40 0.45 0.50 0.55 0.60

Fig S4

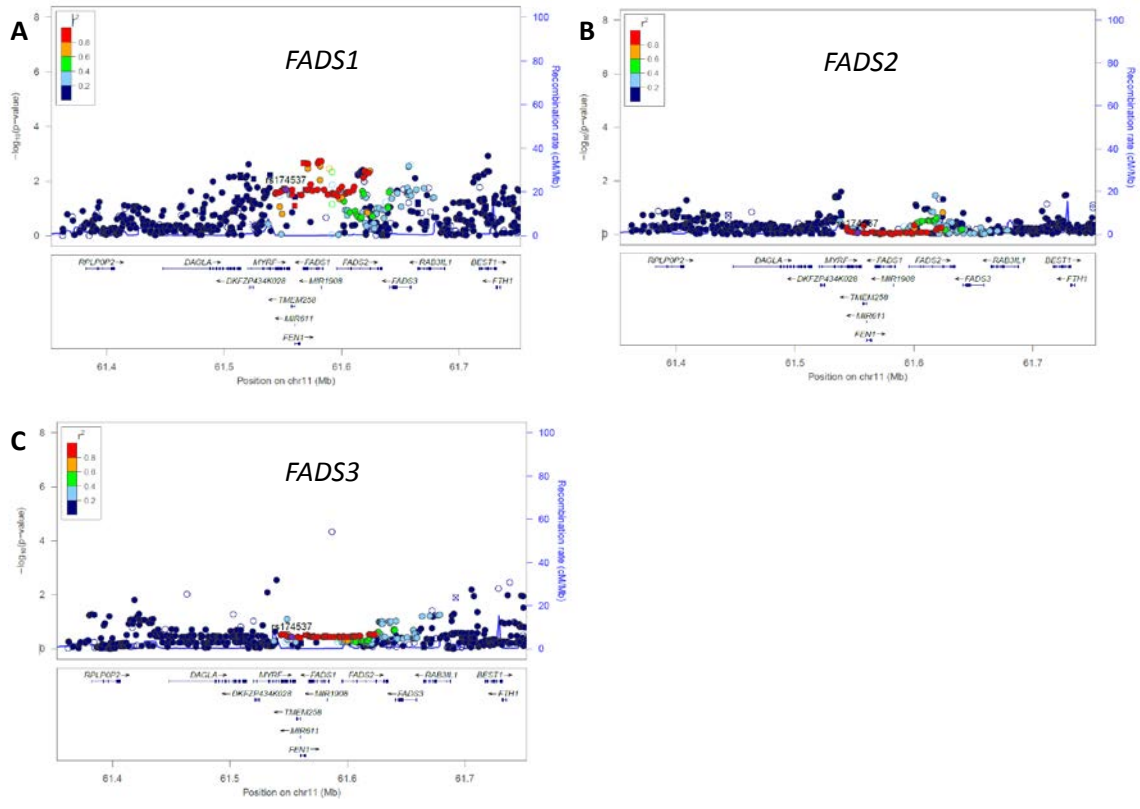

Fig S5

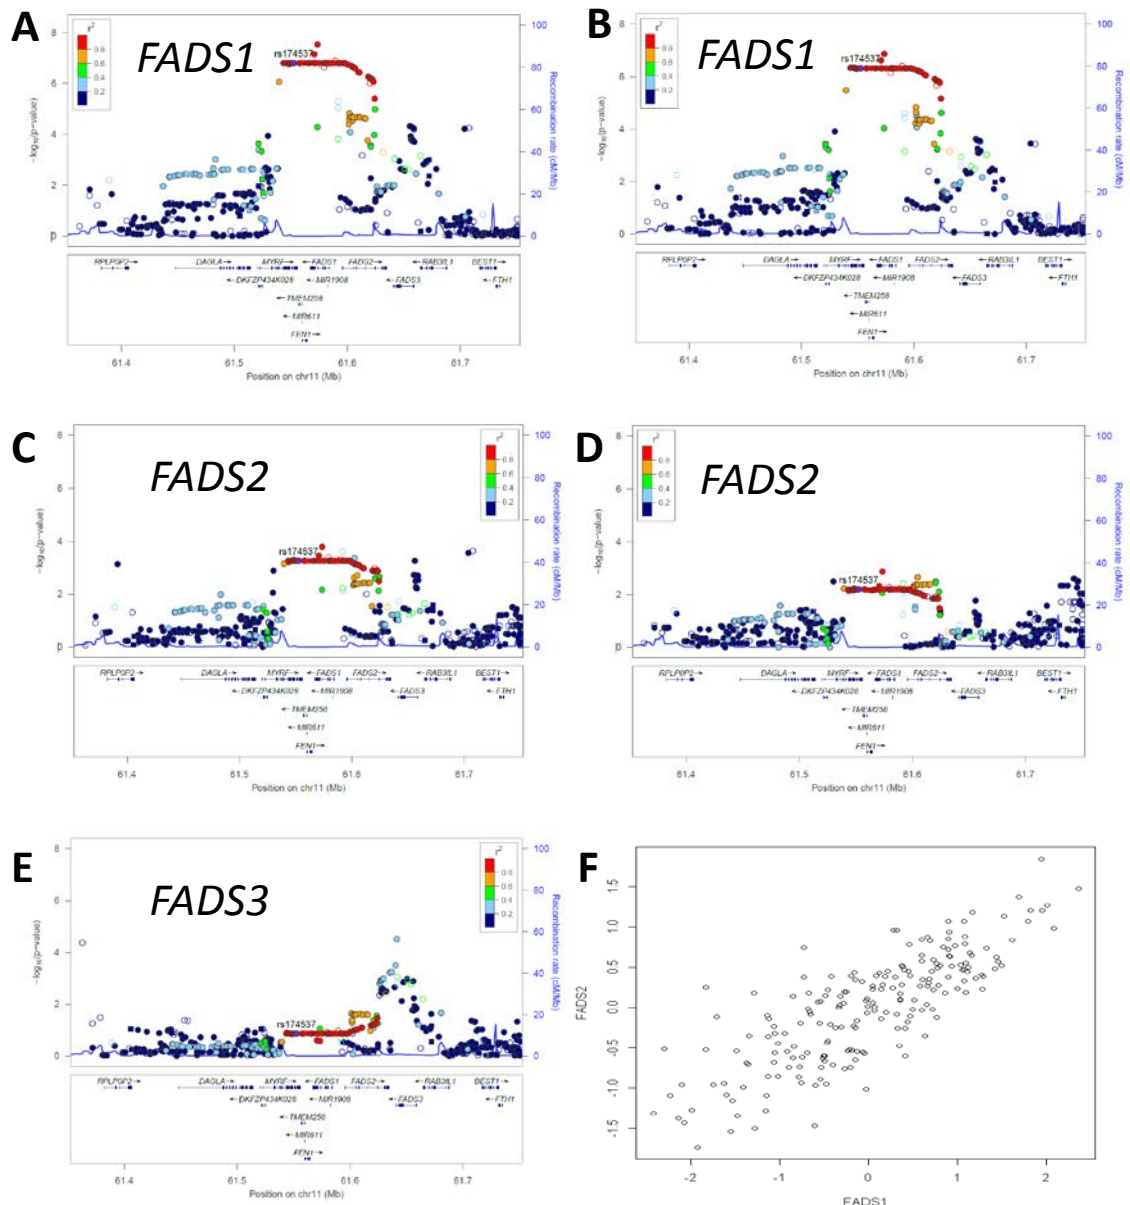



**Table S1. Summary of studies and traits associated with *FADS1* SNPs in our study.**

| SNP                                | Location       | Allele | Position                | Associated traits                                        | References             |
|------------------------------------|----------------|--------|-------------------------|----------------------------------------------------------|------------------------|
| rs1535                             | 61354548       | A/G    | <i>FADS2</i> Intronic   | Blood LDL cholesterol levels                             | Sabatti et al, 2009    |
|                                    |                |        |                         | Circulating sphingolipid levels                          | Hicks et al, 2009      |
|                                    |                |        |                         | Blood HDL cholesterol levels                             | Zabaneh et al, 2010    |
|                                    |                |        |                         | Blood HDL cholesterol levels                             | Lettre et al, 2011     |
|                                    |                |        |                         | Plasma phospholipids levels                              | Lemaitre et al, 2011   |
|                                    |                |        |                         | Blood polyunsaturated fatty acid levels during pregnancy | Steer et al, 2012      |
|                                    |                |        |                         | DHA status in infants                                    | Harslof et al, 2013    |
| rs102275                           | 61314379       | A/G    | <i>TMEM258</i> Intronic | Blood HDL cholesterol and triglycerides levels           | Kathiresan et al, 2008 |
|                                    |                |        |                         | Blood LDL cholesterol levels                             | Sabatti et al, 2009    |
|                                    |                |        |                         | Circulating sphingolipid levels                          | Hicks et al, 2009      |
|                                    |                |        |                         | Crohn's disease                                          | Franke et al, 2010     |
|                                    |                |        |                         | Blood HDL cholesterol levels                             | Zabaneh et al, 2010    |
|                                    |                |        |                         | Plasma phospholipids n-3 fatty acids levels              | Lemaitre et al, 2011   |
|                                    |                |        |                         | Circulating phospholipids levels and ratios              | Demirkan et al, 2012   |
| rs174537                           | 61309256       | G/T    | <i>FADS1</i> Intronic   | Blood LDL cholesterol levels                             | Sabatti et al, 2009    |
|                                    |                |        |                         | Plasma polyunsaturated fatty acids levels                | Tanaka et al, 2009     |
|                                    |                |        |                         | Circulating sphingolipid levels                          | Hicks et al, 2009      |
|                                    |                |        |                         | Serum polyunsaturated fatty acid levels                  | Mathias et al, 2010    |
|                                    |                |        |                         | Serum lipids, CAD risk                                   | Kwak et al, 2011       |
|                                    |                |        |                         | Colostrum long chain polyunsaturated levels              | Morales et al, 2011    |
|                                    |                |        |                         | Plasma phospholipids n-3 fatty acids levels              | Lemaitre et al, 2011   |
|                                    |                |        |                         | Serum phospholipid polyunsaturated fatty acid levels     | Kim et al, 2011        |
|                                    |                |        |                         | Serum arachidonic acid levels                            | Sergeant et al, 2012   |
|                                    |                |        |                         | Age associated serum phospholipid PUFA                   | Hong et al, 2013       |
| CAD risk in Chinese Han Population | Li et al, 2013 |        |                         |                                                          |                        |
| rs174546                           | 61326406       | C/T    | <i>FADS1</i> 3'-UTR     | Blood LDL cholesterol levels                             | Sabatti et al, 2009    |

|          |          |     |                       |                                                                     |                             |
|----------|----------|-----|-----------------------|---------------------------------------------------------------------|-----------------------------|
|          |          |     |                       | Circulating sphingolipid levels                                     | Hicks et al, 2009           |
|          |          |     |                       | Erythrocyte membrane and plasma phospholipid PUFA levels            | Rzehak et al, 2010          |
|          |          |     |                       | Serum fatty acid ratios                                             | Bokor et al, 2010           |
|          |          |     |                       | Plasma total and HDL cholesterol levels                             | Lu et al, 2010              |
|          |          |     |                       | Serum polyunsaturated fatty acid levels                             | Mathias et al, 2010         |
|          |          |     |                       | Plasma triglycerides-, HDL- , LDL- and total cholesterol levels     | Teslovich et al, 2010       |
|          |          |     |                       | n-6 polyunsaturated fatty acid composition in erythrocyte membranes | Zietemann et al, 2010       |
|          |          |     |                       | Blood HDL cholesterol levels                                        | Zabaneh et al, 2010         |
|          |          |     |                       | Serum total and non-HDL cholesterol levels                          | Dumont et al, 2011          |
|          |          |     |                       | Plasma phospholipids n-3 fatty acids levels                         | Lemaitre et al, 2011        |
|          |          |     |                       | Plasma triglycerides levels in Chinese population                   | Zhang et al, 2011           |
|          |          |     |                       | Plasma total and HDL-cholesterol in 2-year old infants              | Molto-Puigmarti et al, 2013 |
| rs174556 | 61337211 | C/T | <i>FADS1</i> Intronic | Serum phospholipids fatty acids levels                              | Schaeffer et al, 2006       |
|          |          |     |                       | Erythrocyte membrane and serum phospholipid fatty acids             | Malerba et al, 2008         |
|          |          |     |                       | Blood LDL cholesterol levels                                        | Sabatti et al, 2009         |
|          |          |     |                       | Circulating sphingolipid levels                                     | Hicks et al, 2009           |
|          |          |     |                       | Plasma polyunsaturated fatty acids levels                           | Tanaka et al, 2009          |
|          |          |     |                       | Serum polyunsaturated fatty acid levels                             | Mathias et al, 2010         |
|          |          |     |                       | Blood HDL cholesterol levels                                        | Zabaneh et al, 2010         |
|          |          |     |                       | CAD risk                                                            | Qin et al, 2011             |
|          |          |     |                       | Erythrocyte membrane and plasma phospholipid PUFA levels            | Rzehak et al, 2010          |
|          |          |     |                       | Acute coronary syndrome in Chinese Han population                   | Song et al, 2013            |
|          |          |     |                       | Plasma total and HDL-cholesterol in 2-year old infants              | Molto-Puigmarti et al, 2013 |
| rs174576 | 61360086 | A/C | <i>FADS2</i> Intronic | Blood triglycerides and HDL-cholesterol levels                      | Barber et al, 2010          |
|          |          |     |                       | Plasma polyunsaturated fatty acid levels                            | Tanaka et al, 2009          |
|          |          |     |                       | Plasma phospholipids n-3 fatty acid levels                          | Lemaitre et al, 2011        |

Note: HDL: high density lipoprotein; LDL: low density lipoprotein; PUFA: polyunsaturated fatty acid; CAD: coronary artery disease.

**Table S2.** Lipids profiled in the study (total number of lipids=357).

| Mass          | Compound Formula | Compound Name            | Mass       | Compound Formula | Compound Name |
|---------------|------------------|--------------------------|------------|------------------|---------------|
| <b>LysoPC</b> |                  |                          | <b>PG</b>  |                  |               |
| 494.3         | C24H48O7PN       | LPC(16:1)                | 710.5      | C36H69O10P       | PG(30:1)      |
| 496.3         | C24H50O7PN       | LPC(16:0)                | 712.5      | C36H71O10P       | PG(30:0)      |
| 518.3         | C26H48O7PN       | LPC(18:3)                | 736.5      | C38H71O10P       | PG(32:2)      |
| 520.3         | C26H50O7PN       | LPC(18:2)                | 738.5      | C38H73O10P       | PG(32:1)      |
| 522.3         | C26H52O7PN       | LPC(18:1)                | 740.5      | C38H75O10P       | PG(32:0)      |
| 524.4         | C26H54O7PN       | LPC(18:0)                | 760.5      | C40H71O10P       | PG(34:4)      |
| 542.3         | C28H48O7PN       | LPC(20:5)                | 762.5      | C40H73O10P       | PG(34:3)      |
| 544.3         | C28H50O7PN       | LPC(20:4)                | 764.5      | C40H75O10P       | PG(34:2)      |
| 546.3         | C28H52O7PN       | LPC(20:3)                | 766.5      | C40H77O10P       | PG(34:1)      |
| 548.4         | C28H54O7PN       | LPC(20:2)                | 768.5      | C40H79O10P       | PG(34:0)      |
| 550.4         | C28H56O7PN       | LPC(20:1)                | 788.5      | C42H75O10P       | PG(36:4)      |
| 552.4         | C28H58O7PN       | LPC(20:0)                | 790.5      | C42H77O10P       | PG(36:3)      |
| 568.3         | C30H50O7PN       | LPC(22:6)                | 792.5      | C42H79O10P       | PG(36:2)      |
| 570.3         | C30H52O7PN       | LPC(22:5)                | 794.6      | C42H81O10P       | PG(36:1)      |
| <b>PC</b>     |                  |                          | 812.5      | C44H75O10P       | PG(38:6)      |
| 676.5         | C36H70O8PN       | PC(28:1)                 | 814.5      | C44H77O10P       | PG(38:5)      |
| 704.5         | C38H74O8PN       | PC(30:1)                 | <b>LPG</b> |                  |               |
| 706.5         | C38H76O8PN       | PC(30:0)                 | 481.3      | C22H43O9P        | LPG(16:1)     |
| 730.5         | C40H76O8PN       | PC(32:2)                 | 483.3      | C22H45O9P        | LPG(16:0)     |
| 732.5         | C40H78O8PN       | PC(32:1)                 | 505.3      | C24H43O9P        | LPG(18:3)     |
| 734.6         | C40H80O8PN       | PC(32:0)                 | 507.3      | C24H45O9P        | LPG(18:2)     |
| 754.5         | C42H76O8PN       | PC(34:4)                 | 509.3      | C24H47O9P        | LPG(18:1)     |
| 756.5         | C42H78O8PN       | PC(34:3)                 | <b>ePS</b> |                  |               |
| 758.6         | C42H80O8PN       | PC(34:2)                 | 746.5      | C40H76O9PN       | ePS(34:2)     |
| 760.6         | C42H82O8PN       | PC(34:1)                 | 748.5      | C40H78O9PN       | ePS(34:1)     |
| 762.6         | C42H84O8PN       | PC(34:0)                 | 772.5      | C42H78O9PN       | ePS(36:3)     |
| 778.5         | C44H76O8PN       | PC(36:6)                 | 774.6      | C42H80O9PN       | ePS(36:2)     |
| 780.5         | C44H78O8PN       | PC(36:5)                 | 776.6      | C42H82O9PN       | ePS(36:1)     |
| 782.6         | C44H80O8PN       | PC(36:4)                 | 778.6      | C42H84O9PN       | ePS(36:0)     |
| 784.6         | C44H82O8PN       | PC(36:3)                 | 794.5      | C44H76O9PN       | ePS(38:6)     |
| 786.6         | C44H84O8PN       | PC(36:2)                 | 796.5      | C44H78O9PN       | ePS(38:5)     |
| 788.6         | C44H86O8PN       | PC(36:1)                 | 798.6      | C44H80O9PN       | ePS(38:4)     |
| 790.6         | C44H88O8PN       | PC(36:0) or<br>ePC(38:7) | 800.6      | C44H82O9PN       | ePS(38:3)     |
| 806.6         | C46H80O8PN       | PC(38:6)                 | 802.6      | C44H84O9PN       | ePS(38:2)     |
| 808.6         | C46H82O8PN       | PC(38:5)                 | 804.6      | C44H86O9PN       | ePS(38:1)     |
| 810.6         | C46H84O8PN       | PC(38:4)                 | 824.6      | C46H82O9PN       | ePS(40:5)     |
| 812.6         | C46H86O8PN       | PC(38:3)                 | 826.6      | C46H84O9PN       | ePS(40:4)     |



|           |             |                          |                   |             |           |
|-----------|-------------|--------------------------|-------------------|-------------|-----------|
| 814.6     | C46H88O8PN  | PC(38:2)                 | 828.6             | C46H86O9PN  | ePS(40:3) |
| 816.6     | C46H90O8PN  | PC(38:1)                 | 830.6             | C46H88O9PN  | ePS(40:2) |
| 818.7     | C46H92O8PN  | PC(38:0) or<br>ePC(40:7) |                   |             |           |
| 830.6     | C48H80O8PN  | PC(40:8)                 | <b>PA</b>         |             |           |
| 832.6     | C48H82O8PN  | PC(40:7)                 | 658.4             | C35H61O8P   | PA(32:4)  |
| 834.6     | C48H84O8PN  | PC(40:6)                 | 660.4             | C35H63O8P   | PA(32:3)  |
| 836.6     | C48H86O8PN  | PC(40:5)                 | 662.4             | C35H65O8P   | PA(32:2)  |
| 838.6     | C48H88O8PN  | PC(40:4)                 | 664.5             | C35H67O8P   | PA(32:1)  |
| 840.6     | C48H90O8PN  | PC(40:3)                 | 666.5             | C35H69O8P   | PA(32:0)  |
| 842.7     | C48H92O8PN  | PC(40:2)                 | 686.4             | C37H65O8P   | PA(34:4)  |
| 852.5     | C50H78O8PN  | PC(42:11)                | 688.5             | C37H67O8P   | PA(34:3)  |
| 854.6     | C50H80O8PN  | PC(42:10)                | 690.5             | C37H69O8P   | PA(34:2)  |
| 856.6     | C50H82O8PN  | PC(42:9)                 | 692.5             | C37H71O8P   | PA(34:1)  |
| 858.6     | C50H84O8PN  | PC(42:8)                 | 710.4             | C39H65O8P   | PA(36:6)  |
| 860.6     | C50H86O8PN  | PC(42:7)                 | 712.5             | C39H67O8P   | PA(36:5)  |
| 862.6     | C50H88O8PN  | PC(42:6)                 | 714.5             | C39H69O8P   | PA(36:4)  |
| 864.6     | C50H90O8PN  | PC(42:5)                 | 716.5             | C39H71O8P   | PA(36:3)  |
| 866.7     | C50H92O8PN  | PC(42:4)                 | 718.5             | C39H73O8P   | PA(36:2)  |
| 868.7     | C50H94O8PN  | PC(42:3)                 | 738.5             | C41H69O8P   | PA(38:6)  |
| 870.7     | C50H96O8PN  | PC(42:2)                 | 740.5             | C41H71O8P   | PA(38:5)  |
| 878.6     | C52H80O8PN  | PC(44:12)                | 742.5             | C41H73O8P   | PA(38:4)  |
| 880.6     | C52H82O8PN  | PC(44:11)                | 744.5             | C41H75O8P   | PA(38:3)  |
| 882.6     | C52H84O8PN  | PC(44:10)                | 746.5             | C41H77O8P   | PA(38:2)  |
| 884.6     | C52H86O8PN  | PC(44:9)                 | 764.5             | C43H71O8P   | PA(40:7)  |
| 886.6     | C52H88O8PN  | PC(44:8)                 | 766.5             | C43H73O8P   | PA(40:6)  |
| 888.6     | C52H90O8PN  | PC(44:7)                 | 768.5             | C43H75O8P   | PA(40:5)  |
| 890.7     | C52H92O8PN  | PC(44:6)                 | <b>SM and DSM</b> |             |           |
| 892.7     | C52H94O8PN  | PC(44:5)                 | 701.5             | C39H77N2O6P | SM(16:1)  |
| 894.7     | C52H96O8PN  | PC(44:4)                 | 703.6             | C39H79N2O6P | SM(16:0)  |
| 896.7     | C52H98O8PN  | PC(44:3)                 | 705.6             | C39H81N2O6P | DSM(16:0) |
| 898.7     | C52H100O8PN | PC(44:2)                 | 729.6             | C41H81N2O6P | SM(18:1)  |
| <b>PE</b> |             |                          | 731.6             | C41H83N2O6P | SM(18:0)  |
| 634.4     | C33H64O8PN  | PE(28:1)                 | 733.6             | C41H85N2O6P | DSM(18:0) |
| 636.5     | C33H66O8PN  | PE(28:0)                 | 785.6             | C45H89N2O6P | SM(22:1)  |
| 662.5     | C35H68O8PN  | PE(30:1)                 | 787.7             | C45H91N2O6P | SM(22:0)  |
| 664.5     | C35H70O8PN  | PE(30:0)                 | 789.7             | C45H93N2O6P | DSM(22:0) |
| 688.5     | C37H70O8PN  | PE(32:2)                 | 813.7             | C47H93N2O6P | SM(24:1)  |
| 690.5     | C37H72O8PN  | PE(32:1)                 | 815.7             | C47H95N2O6P | SM(24:0)  |
| 692.5     | C37H74O8PN  | PE(32:0)                 | 817.7             | C47H97N2O6P | DSM(24:0) |
| 712.5     | C39H70O8PN  | PE(34:4)                 | <b>ePC</b>        |             |           |
| 714.5     | C39H72O8PN  | PE(34:3)                 | 714.5             | C40H76O7PN  | ePC(32:3) |
|           |             |                          | 716.6             | C40H78O7PN  | ePC(32:2) |

|       |            |           |       |               |                           |
|-------|------------|-----------|-------|---------------|---------------------------|
| 716.5 | C39H74O8PN | PE(34:2)  | 718.6 | C40H80O7PN    | ePC(32:1)                 |
| 718.5 | C39H76O8PN | PE(34:1)  | 720.6 | C40H82O7PN    | ePC(32:0)                 |
| 720.5 | C39H78O8PN | PE(34:0)  | 740.6 | C42H78O7PN    | ePC(34:4)                 |
| 736.5 | C41H70O8PN | PE(36:6)  | 742.6 | C42H80O7PN    | ePC(34:3)                 |
| 738.5 | C41H72O8PN | PE(36:5)  | 744.6 | C42H82O7PN    | ePC(34:2)                 |
| 740.5 | C41H74O8PN | PE(36:4)  | 746.6 | C42H84O7PN    | ePC(34:1)                 |
| 742.5 | C41H76O8PN | PE(36:3)  | 748.6 | C42H86O7PN    | ePC(34:0)                 |
| 744.5 | C41H78O8PN | PE(36:2)  | 766.6 | C44H80O7PN    | ePC(36:5)                 |
| 746.6 | C41H80O8PN | PE(36:1)  | 768.6 | C44H82O7PN    | ePC(36:4)                 |
| 748.6 | C41H82O8PN | PE(36:0)  | 770.6 | C44H84O7PN    | ePC(36:3)                 |
| 764.5 | C43H74O8PN | PE(38:6)  | 772.6 | C44H86O7PN    | ePC(36:2)                 |
| 766.5 | C43H76O8PN | PE(38:5)  | 774.6 | C44H88O7PN    | ePC(36:1)                 |
| 768.5 | C43H78O8PN | PE(38:4)  | 776.6 | C44H90O7PN    | ePC(36:0)                 |
| 770.6 | C43H80O8PN | PE(38:3)  | 792.6 | C46H82O7PN    | ePC(38:6)                 |
| 772.6 | C43H82O8PN | PE(38:2)  | 794.6 | C46H84O7PN    | ePC(38:5)                 |
| 774.6 | C43H84O8PN | PE(38:1)  | 796.6 | C46H86O7PN    | ePC(38:4)                 |
| 776.6 | C43H86O8PN | PE(38:0)  | 798.6 | C46H88O7PN    | ePC(38:3)                 |
| 788.5 | C45H74O8PN | PE(40:8)  | 800.6 | C46H90O7PN    | ePC(38:2)                 |
| 790.5 | C45H76O8PN | PE(40:7)  | 802.7 | C46H92O7PN    | ePC(38:1)<br>ePC(38:0) or |
| 792.5 | C45H78O8PN | PE(40:6)  | 804.7 | C46H94O7PN    | PC(38:7)                  |
| 794.6 | C45H80O8PN | PE(40:5)  | 820.6 | C48H86O7PN    | ePC(40:6)                 |
| 796.6 | C45H82O8PN | PE(40:4)  | 822.6 | C48H88O7PN    | ePC(40:5)                 |
| 798.6 | C45H84O8PN | PE(40:3)  | 824.6 | C48H90O7PN    | ePC(40:4)                 |
| 800.6 | C45H86O8PN | PE(40:2)  | 826.7 | C48H92O7PN    | ePC(40:3)                 |
| 812.5 | C47H74O8PN | PE(42:10) | 828.7 | C48H94O7PN    | ePC(40:2)                 |
| 814.5 | C47H76O8PN | PE(42:9)  |       | <b>LysoPE</b> |                           |
| 816.5 | C47H78O8PN | PE(42:8)  | 452.3 | C21H42O7PN    | LPE(16:1)                 |
| 818.6 | C47H80O8PN | PE(42:7)  | 454.3 | C21H44O7PN    | LPE(16:0)                 |
| 820.6 | C47H82O8PN | PE(42:6)  | 476.3 | C23H42O7PN    | LPE(18:3)                 |
| 822.6 | C47H84O8PN | PE(42:5)  | 478.3 | C23H44O7PN    | LPE(18:2)                 |
| 824.6 | C47H86O8PN | PE(42:4)  | 480.3 | C23H46O7PN    | LPE(18:1)                 |
| 826.6 | C47H88O8PN | PE(42:3)  | 500.3 | C25H42O7PN    | LPE(20:5)                 |
| 828.6 | C47H90O8PN | PE(42:2)  | 502.3 | C25H44O7PN    | LPE(20:4)                 |
| 836.5 | C49H74O8PN | PE(44:12) | 504.3 | C25H46O7PN    | LPE(20:3)                 |
| 838.5 | C49H76O8PN | PE(44:11) | 506.3 | C25H48O7PN    | LPE(20:2)                 |
| 840.5 | C49H78O8PN | PE(44:10) | 508.3 | C25H50O7PN    | LPE(20:1)                 |
| 842.6 | C49H80O8PN | PE(44:9)  | 510.3 | C25H52O7PN    | LPE(20:0)                 |
| 844.6 | C49H82O8PN | PE(44:8)  | 526.3 | C27H44O7PN    | LPE(22:6)                 |
| 846.6 | C49H84O8PN | PE(44:7)  | 528.3 | C27H46O7PN    | LPE(22:5)                 |
| 848.6 | C49H86O8PN | PE(44:6)  |       | <b>PE-Cer</b> |                           |
| 850.6 | C49H88O8PN | PE(44:5)  | 659.5 | C36H71O6PN2   | PE-Cer(16:1)              |

|            |            |           |           |             |              |
|------------|------------|-----------|-----------|-------------|--------------|
| 852.6      | C49H90O8PN | PE(44:4)  | 661.5     | C36H73O6PN2 | PE-Cer(16:0) |
| 854.7      | C49H92O8PN | PE(44:3)  | 687.5     | C38H75O6PN2 | PE-Cer(18:1) |
| 856.7      | C49H94O8PN | PE(44:2)  | 689.5     | C38H77O6PN2 | PE-Cer(18:0) |
| <b>ePE</b> |            |           | 773.6     | C44H89O6PN2 | PE-Cer(24:0) |
| 672.5      | C37H70O7PN | ePE(32:3) | <b>PS</b> |             |              |
| 674.5      | C37H72O7PN | ePE(32:2) | 734.5     | C38H72O10PN | PS(32:1)     |
| 676.5      | C37H74O7PN | ePE(32:1) | 736.5     | C38H74O10PN | PS(32:0)     |
| 678.5      | C37H76O7PN | ePE(32:0) | 756.5     | C40H70O10PN | PS(34:4)     |
| 698.5      | C39H72O7PN | ePE(34:4) | 758.5     | C40H72O10PN | PS(34:3)     |
| 700.5      | C39H74O7PN | ePE(34:3) | 760.5     | C40H74O10PN | PS(34:2)     |
| 702.5      | C39H76O7PN | ePE(34:2) | 762.5     | C40H76O10PN | PS(34:1)     |
| 704.6      | C39H78O7PN | ePE(34:1) | 764.5     | C40H78O10PN | PS(34:0)     |
| 706.6      | C39H80O7PN | ePE(34:0) | 780.5     | C42H70O10PN | PS(36:6)     |
| 724.5      | C41H74O7PN | ePE(36:5) | 782.5     | C42H72O10PN | PS(36:5)     |
| 726.5      | C41H76O7PN | ePE(36:4) | 784.5     | C42H74O10PN | PS(36:4)     |
| 728.6      | C41H78O7PN | ePE(36:3) | 786.5     | C42H76O10PN | PS(36:3)     |
| 730.6      | C41H80O7PN | ePE(36:2) | 788.5     | C42H78O10PN | PS(36:2)     |
| 732.6      | C41H82O7PN | ePE(36:1) | 790.6     | C42H80O10PN | PS(36:1)     |
| 734.6      | C41H84O7PN | ePE(36:0) | 792.6     | C42H82O10PN | PS(36:0)     |
| 750.5      | C43H76O7PN | ePE(38:6) | 806.5     | C44H72O10PN | PS(38:7)     |
| 752.6      | C43H78O7PN | ePE(38:5) | 808.5     | C44H74O10PN | PS(38:6)     |
| 754.6      | C43H80O7PN | ePE(38:4) | 810.5     | C44H76O10PN | PS(38:5)     |
| 756.6      | C43H82O7PN | ePE(38:3) | 812.5     | C44H78O10PN | PS(38:4)     |
| 758.6      | C43H84O7PN | ePE(38:2) | 814.6     | C44H80O10PN | PS(38:3)     |
| 760.6      | C43H86O7PN | ePE(38:1) | 816.6     | C44H82O10PN | PS(38:2)     |
| 762.6      | C43H88O7PN | ePE(38:0) | 818.6     | C44H84O10PN | PS(38:1)     |
| 778.6      | C45H80O7PN | ePE(40:6) | 820.6     | C44H86O10PN | PS(38:0)     |
| 780.6      | C45H82O7PN | ePE(40:5) | 832.5     | C46H74O10PN | PS(40:8)     |
| 782.6      | C45H84O7PN | ePE(40:4) | 834.5     | C46H76O10PN | PS(40:7)     |
| 784.6      | C45H86O7PN | ePE(40:3) | 836.5     | C46H78O10PN | PS(40:6)     |
| 786.6      | C45H88O7PN | ePE(40:2) | 838.6     | C46H80O10PN | PS(40:5)     |
| <b>PI</b>  |            |           | 840.6     | C46H82O10PN | PS(40:4)     |
| 848.5      | C43H75O13P | PI(34:4)  | 842.6     | C46H84O10PN | PS(40:3)     |
| 850.5      | C43H77O13P | PI(34:3)  | 844.6     | C46H86O10PN | PS(40:2)     |
| 852.5      | C43H79O13P | PI(34:2)  | 846.6     | C46H88O10PN | PS(40:1)     |
| 854.5      | C43H81O13P | PI(34:1)  | 854.5     | C48H72O10PN | PS(42:11)    |
| 872.5      | C45H75O13P | PI(36:6)  | 856.5     | C48H74O10PN | PS(42:10)    |
| 874.5      | C45H77O13P | PI(36:5)  | 858.5     | C48H76O10PN | PS(42:9)     |
| 876.5      | C45H79O13P | PI(36:4)  | 860.5     | C48H78O10PN | PS(42:8)     |
| 878.5      | C45H81O13P | PI(36:3)  | 862.6     | C48H80O10PN | PS(42:7)     |
| 880.6      | C45H83O13P | PI(36:2)  | 864.6     | C48H82O10PN | PS(42:6)     |

|       |            |           |       |             |           |
|-------|------------|-----------|-------|-------------|-----------|
| 882.6 | C45H85O13P | PI(36:1)  | 866.6 | C48H84O10PN | PS(42:5)  |
| 900.5 | C47H79O13P | PI(38:6)  | 880.5 | C50H74O10PN | PS(44:12) |
| 902.5 | C47H81O13P | PI(38:5)  | 882.5 | C50H76O10PN | PS(44:11) |
| 904.6 | C47H83O13P | PI(38:4)  | 884.5 | C50H78O10PN | PS(44:10) |
| 906.6 | C47H85O13P | PI(38:3)  | 886.6 | C50H80O10PN | PS(44:9)  |
| 908.6 | C47H87O13P | PI(38:2)  | 888.6 | C50H82O10PN | PS(44:8)  |
| 910.6 | C47H89O13P | PI(38:1)  | 890.6 | C50H84O10PN | PS(44:7)  |
| 912.6 | C47H91O13P | PI(38:0)  | 892.6 | C50H86O10PN | PS(44:6)  |
| 924.5 | C49H79O13P | PI(40:8)  | 894.6 | C50H88O10PN | PS(44:5)  |
| 926.5 | C49H81O13P | PI(40:7)  | 896.6 | C50H90O10PN | PS(44:4)  |
| 928.6 | C49H83O13P | PI(40:6)  | 898.6 | C50H92O10PN | PS(44:3)  |
| 930.6 | C49H85O13P | PI(40:5)  | 900.7 | C50H94O10PN | PS(44:2)  |
| 932.6 | C49H87O13P | PI(40:4)  |       |             |           |
| 934.6 | C49H89O13P | PI(40:3)  |       |             |           |
| 936.6 | C49H91O13P | PI(40:2)  |       |             |           |
| 938.6 | C49H93O13P | PI(40:1)  |       |             |           |
| 940.7 | C49H95O13P | PI(40:0)  |       |             |           |
| 948.5 | C51H79O13P | PI(42:10) |       |             |           |
| 950.5 | C51H81O13P | PI(42:9)  |       |             |           |
| 952.6 | C51H83O13P | PI(42:8)  |       |             |           |
| 954.6 | C51H85O13P | PI(42:7)  |       |             |           |
| 956.6 | C51H87O13P | PI(42:6)  |       |             |           |
| 958.6 | C51H89O13P | PI(42:5)  |       |             |           |
| 960.6 | C51H91O13P | PI(42:4)  |       |             |           |
| 962.6 | C51H93O13P | PI(42:3)  |       |             |           |
| 964.7 | C51H95O13P | PI(42:2)  |       |             |           |
| 972.5 | C53H79O13P | PI(44:12) |       |             |           |
| 974.5 | C53H81O13P | PI(44:11) |       |             |           |
| 976.6 | C53H83O13P | PI(44:10) |       |             |           |
| 978.6 | C53H85O13P | PI(44:9)  |       |             |           |
| 980.6 | C53H87O13P | PI(44:8)  |       |             |           |
| 982.6 | C53H89O13P | PI(44:7)  |       |             |           |
| 984.6 | C53H91O13P | PI(44:6)  |       |             |           |
| 986.6 | C53H93O13P | PI(44:5)  |       |             |           |
| 988.7 | C53H95O13P | PI(44:4)  |       |             |           |
| 990.7 | C53H97O13P | PI(44:3)  |       |             |           |
| 992.7 | C53H99O13P | PI(44:2)  |       |             |           |



**Table S3.** Association between *FADS* polymorphisms and lipid ratios.

| SNP                   | ID                    | Molecule              | Ratio*            | Beta  | R <sup>2</sup> | p-value  |          |
|-----------------------|-----------------------|-----------------------|-------------------|-------|----------------|----------|----------|
| rs174576              | C44H80O8PN/C47H85O13P | PC(36:4)/PI(38:3)     | D/S               | -2.17 | 0.17           | 1.72E-07 |          |
|                       | C44H82O8PN/C46H82O8PN | PC(36:3)/PC(38:5)     | S/D               | 0.43  | 0.17           | 1.05E-07 |          |
|                       | C47H83O13P/C47H85O13P | PI(38:4)/PI(38:3)     | D/S               | -1.94 | 0.22           | 8.65E-10 |          |
|                       | C46H84O8PN/C46H86O8PN | PC(38:4)/PC(38:3)     | D/S               | -0.86 | 0.16           | 2.99E-07 |          |
|                       | C43H76O8PN/C47H85O13P | PE(38:5)/PI(38:3)     | D/S               | -1.13 | 0.17           | 1.09E-07 |          |
|                       | C46H82O8PN/C46H86O8PN | PC(38:5)/PC(38:3)     | D/S               | -0.49 | 0.15           | 4.82E-07 |          |
|                       | C46H82O8PN/C47H85O13P | PC(38:5)/PI(38:3)     | D/S               | -0.51 | 0.18           | 4.51E-08 |          |
|                       | C47H85O13P/C45H76O8PN | PI(38:3)/PE(40:5)     | S/D               | 0.38  | 0.16           | 2.53E-07 |          |
|                       | C47H85O13P/C47H81O13P | PI(38:3)/PI(38:5)     | S/D               | 0.44  | 0.17           | 1.08E-07 |          |
|                       | C47H85O13P/C44H78O8PN | PI(38:3)/PC(36:5)     | S/D               | 1.31  | 0.17           | 1.38E-07 |          |
|                       | C47H85O13P/C45H79O13P | PI(38:3)/PI(36:4)     | S/D               | 0.55  | 0.19           | 1.77E-08 |          |
|                       | C47H85O13P/C49H85O13P | PI(38:3)/PI(40:5)     | S/D               | 0.90  | 0.20           | 4.47E-09 |          |
|                       | C47H85O13P/C43H80O7PN | PI(38:3)/ePE(38:4)    | S/D               | 1.49  | 0.16           | 2.47E-07 |          |
|                       | C47H85O13P/C43H82O8PN | PI(38:3)/PE(38:2)     | D/S               | 1.98  | 0.16           | 2.55E-07 |          |
|                       | C47H85O13P/C49H87O13P | PI(38:3)/PI(40:4)     | S/D               | 4.54  | 0.17           | 5.47E-08 |          |
|                       | C43H80O8PN/C45H79O13P | PE(38:3)/PI(36:4)     | S/D               | 0.28  | 0.20           | 7.13E-09 |          |
|                       | C43H80O8PN/C43H80O7PN | PE(38:3)/ePE(38:4)    | S/D               | 0.70  | 0.15           | 4.74E-07 |          |
|                       | rs1535                | C44H80O8PN/C47H85O13P | PC(36:4)/PI(38:3) | D/S   | -2.11          | 0.16     | 3.78E-07 |
|                       |                       | C44H82O8PN/C46H82O8PN | PC(36:3)/PC(38:5) | S/D   | 0.43           | 0.17     | 1.27E-07 |
|                       |                       | C47H83O13P/C47H85O13P | PI(38:4)/PI(38:3) | D/S   | -1.88          | 0.21     | 3.08E-09 |
| C43H76O8PN/C47H85O13P |                       | PE(38:5)/PI(38:3)     | D/S               | -1.10 | 0.16           | 2.80E-07 |          |
| C46H82O8PN/C47H85O13P |                       | PC(38:5)/PI(38:3)     | D/S               | -0.49 | 0.17           | 1.06E-07 |          |
| C47H85O13P/C47H81O13P |                       | PI(38:3)/PI(38:5)     | S/D               | 0.43  | 0.16           | 2.97E-07 |          |
| C47H85O13P/C44H78O8PN |                       | PI(38:3)/PC(36:5)     | S/D               | 1.28  | 0.16           | 2.42E-07 |          |
| C47H85O13P/C45H79O13P |                       | PI(38:3)/PI(36:4)     | S/D               | 0.54  | 0.18           | 3.11E-08 |          |
| C47H85O13P/C49H85O13P |                       | PI(38:3)/PI(40:5)     | S/D               | 0.86  | 0.18           | 1.81E-08 |          |
| C47H85O13P/C43H80O7PN |                       | PI(38:3)/ePE(38:4)    | S/D               | 1.51  | 0.17           | 1.48E-07 |          |
| C47H85O13P/C43H82O8PN |                       | PI(38:3)/PE(38:2)     | D/S               | 1.93  | 0.15           | 5.03E-07 |          |
| C47H85O13P/C49H87O13P |                       | PI(38:3)/PI(40:4)     | S/D               | 4.59  | 0.18           | 3.54E-08 |          |
| C43H80O8PN/C45H79O13P |                       | PE(38:3)/PI(36:4)     | S/D               | 0.28  | 0.19           | 2.14E-08 |          |
| C43H80O8PN/C43H80O7PN |                       | PE(38:3)/ePE(38:4)    | S/D               | 0.70  | 0.15           | 4.49E-07 |          |
| rs174546              |                       | C44H80O8PN/C47H85O13P | PC(36:4)/PI(38:3) | D/S   | -2.11          | 0.16     | 3.78E-07 |
|                       |                       | C44H82O8PN/C46H82O8PN | PC(36:3)/PC(38:5) | S/D   | 0.43           | 0.17     | 1.27E-07 |
|                       |                       | C47H83O13P/C47H85O13P | PI(38:4)/PI(38:3) | D/S   | -1.88          | 0.21     | 3.08E-09 |
|                       |                       | C43H76O8PN/C47H85O13P | PE(38:5)/PI(38:3) | D/S   | -1.10          | 0.16     | 2.80E-07 |
|                       |                       | C46H82O8PN/C47H85O13P | PC(38:5)/PI(38:3) | D/S   | -0.49          | 0.17     | 1.06E-07 |
|                       |                       | C47H85O13P/C47H81O13P | PI(38:3)/PI(38:5) | S/D   | 0.43           | 0.16     | 2.97E-07 |
|                       | C47H85O13P/C44H78O8PN | PI(38:3)/PC(36:5)     | S/D               | 1.28  | 0.16           | 2.42E-07 |          |
|                       | C47H85O13P/C45H79O13P | PI(38:3)/PI(36:4)     | S/D               | 0.54  | 0.18           | 3.11E-08 |          |
|                       | C47H85O13P/C49H85O13P | PI(38:3)/PI(40:5)     | S/D               | 0.86  | 0.19           | 1.81E-08 |          |
|                       | C47H85O13P/C43H80O7PN | PI(38:3)/ePE(38:4)    | S/D               | 1.51  | 0.17           | 1.48E-07 |          |
|                       | C47H85O13P/C43H82O8PN | PI(38:3)/PE(38:2)     | D/S               | 1.93  | 0.15           | 5.03E-07 |          |
|                       | C47H85O13P/C49H87O13P | PI(38:3)/PI(40:4)     | S/D               | 4.59  | 0.18           | 3.54E-08 |          |
|                       | C43H80O8PN/C45H79O13P | PE(38:3)/PI(36:4)     | S/D               | 0.28  | 0.19           | 2.14E-08 |          |
|                       | C43H80O8PN/C43H80O7PN | PE(38:3)/ePE(38:4)    | S/D               | 0.70  | 0.15           | 4.49E-07 |          |
|                       | rs102275              | C44H80O8PN/C47H85O13P | PC(36:4)/PI(38:3) | D/S   | -2.10          | 0.16     | 2.95E-07 |
|                       |                       | C44H82O8PN/C46H82O8PN | PC(36:3)/PC(38:5) | S/D   | 0.42           | 0.16     | 2.08E-07 |
|                       |                       | C47H83O13P/C47H85O13P | PI(38:4)/PI(38:3) | D/S   | 1.94           | 0.23     | 4.31E-10 |
|                       |                       | C46H84O8PN/C46H86O8PN | PC(38:4)/PC(38:3) | D/S   | -0.87          | 0.17     | 1.50E-07 |
|                       |                       | C43H76O8PN/C47H85O13P | PE(38:5)/PI(38:3) | D/S   | -1.10          | 0.16     | 1.76E-07 |
|                       |                       | C46H82O8PN/C46H86O8PN | PC(38:4)/PC(38:3) | D/S   | -0.51          | 0.17     | 1.31E-07 |
| C46H82O8PN/C47H85O13P |                       | PC(38:5)/PI(38:3)     | D/S               | -0.50 | 0.18           | 5.14E-08 |          |
| C47H85O13P/C47H81O13P |                       | PI(38:3)/PI(38:5)     | S/D               | 0.46  | 0.18           | 2.65E-08 |          |
| C47H85O13P/C44H78O8PN |                       | PI(38:3)/PC(36:5)     | S/D               | 1.28  | 0.17           | 1.75E-07 |          |
| C47H85O13P/C45H79O13P |                       | PI(38:3)/PI(36:4)     | S/D               | 0.55  | 0.19           | 1.02E-08 |          |
| C47H85O13P/C49H85O13P |                       | PI(38:3)/PI(40:5)     | S/D               | 0.88  | 0.20           | 4.46E-09 |          |
| C47H85O13P/C43H82O8PN |                       | PI(38:3)/ePE(38:4)    | S/D               | 1.95  | 0.16           | 2.41E-07 |          |

|          |                       |                    |     |       |      |          |
|----------|-----------------------|--------------------|-----|-------|------|----------|
|          | C47H85O13P/C49H87O13P | PI(38:3)/PI(40:5)  | S/D | 4.42  | 0.17 | 7.63E-08 |
|          | C43H80O8PN/C47H81O13P | PE(38:3)/PI(38:5)  | S/D | 0.26  | 0.16 | 3.85E-07 |
|          | C43H80O8PN/C45H79O13P | PE(38:3)/PI(38:5)  | S/D | 0.29  | 0.21 | 2.26E-09 |
|          | C43H80O8PN/C43H80O7PN | PE(38:3)/ePE(38:4) | S/D | 0.69  | 0.16 | 4.40E-07 |
| rs174537 | C44H80O8PN/C47H85O13P | PC(36:4)/PI(38:3)  | D/S | -2.11 | 0.16 | 3.78E-07 |
|          | C44H82O8PN/C46H82O8PN | PC(36:3)/PC(38:5)  | S/D | 0.43  | 0.17 | 1.27E-07 |
|          | C47H83O13P/C47H85O13P | PI(38:4)/PI(38:3)  | D/S | -1.88 | 0.21 | 3.08E-09 |
|          | C43H76O8PN/C47H85O13P | PE(38:5)/PI(38:3)  | D/S | -1.10 | 0.16 | 2.80E-07 |
|          | C46H82O8PN/C47H85O13P | PC(38:5)/PI(38:3)  | D/S | -0.50 | 0.17 | 1.06E-07 |
|          | C47H85O13P/C47H81O13P | PI(38:3)/PI(38:5)  | S/D | 0.43  | 0.16 | 2.97E-07 |
|          | C47H85O13P/C44H78O8PN | PI(38:3)/PC(36:5)  | S/D | 1.28  | 0.16 | 2.42E-07 |
|          | C47H85O13P/C45H79O13P | PI(38:3)/PI(36:4)  | S/D | 0.54  | 0.18 | 3.11E-08 |
|          | C47H85O13P/C49H85O13P | PI(38:3)/PI(40:5)  | S/D | 0.86  | 0.19 | 1.81E-08 |
|          | C47H85O13P/C43H80O7PN | PI(38:3)/ePE(38:4) | S/D | 1.51  | 0.17 | 1.48E-07 |
|          | C47H85O13P/C43H82O8PN | PI(38:3)/PE(38:2)  | D/S | 1.93  | 0.15 | 5.03E-07 |
|          | C47H85O13P/C49H87O13P | PI(38:3)/PI(40:4)  | S/D | 4.59  | 0.18 | 3.53E-08 |
|          | C43H80O8PN/C45H79O13P | PE(38:3)/PI(36:4)  | S/D | 0.28  | 0.19 | 2.14E-08 |
|          | C43H80O8PN/C43H80O7PN | PE(38:3)/ePE(38:4) | S/D | 0.70  | 0.15 | 4.49E-07 |
| rs174556 | C44H82O8PN/C46H82O8PN | PC(36:3)/PC(38:5)  | S/D | 0.45  | 0.16 | 1.90E-07 |
|          | C47H83O13P/C47H85O13P | PI(38:4)/PI(38:3)  | D/S | -1.89 | 0.18 | 3.80E-08 |
|          | C43H76O8PN/C47H85O13P | PE(38:5)/PI(38:3)  | D/S | -1.15 | 0.15 | 5.79E-07 |
|          | C46H82O8PN/C47H85O13P | PC(38:5)/PI(38:3)  | D/S | -0.51 | 0.15 | 4.68E-07 |
|          | C47H85O13P/C45H80O8PN | PI(38:3)/PE(40:5)  | S/D | 0.27  | 0.16 | 3.90E-07 |
|          | C47H85O13P/C45H79O13P | PI(38:3)/PE(40:7)  | S/D | 0.60  | 0.19 | 1.62E-08 |
|          | C47H85O13P/C49H85O13P | PI(38:3)/PI(40:5)  | S/D | 0.96  | 0.20 | 3.94E-09 |
|          | C47H85O13P/C43H80O7PN | PI(38:3)/ePE(38:4) | S/D | 1.61  | 0.16 | 1.99E-07 |
|          | C47H85O13P/C49H87O13P | PI(38:3)/PI(40:4)  | S/D | 5.31  | 0.21 | 2.17E-09 |

\*D/S refers to the ratios between more desaturated (D) lipids and relatively more saturated (S) lipids.

**Table S4.** Six core study SNPs and their LD proxies located in transcription factor binding sites (TFBS) that were identified in the ENCODE project. \*MAF refers to minor allele frequency.

| SNPs     | Gene Position       | TFBS                                                                                                                                                                                                                                                                                                                                                       | MAF*  |
|----------|---------------------|------------------------------------------------------------------------------------------------------------------------------------------------------------------------------------------------------------------------------------------------------------------------------------------------------------------------------------------------------------|-------|
| rs174537 | MYRF intron         | Pol2A, REST, MAZ, SRF, POU2F2                                                                                                                                                                                                                                                                                                                              | 0.333 |
| rs174576 | FADS2 intron        | JUND                                                                                                                                                                                                                                                                                                                                                       | 0.392 |
| rs102275 | TMEM258 intron      | NA                                                                                                                                                                                                                                                                                                                                                         | 0.482 |
| rs174546 | FADS1 3'UTR         | POLR2A                                                                                                                                                                                                                                                                                                                                                     | 0.33  |
| rs1535   | FADS2 intron        | POLR2A, ESR1                                                                                                                                                                                                                                                                                                                                               | 0.349 |
| rs174556 | FADS1 intron        | CEBPB                                                                                                                                                                                                                                                                                                                                                      | 0.308 |
| rs174536 | MYRF intron         | CTCF                                                                                                                                                                                                                                                                                                                                                       | 0.333 |
| rs174535 | MYRF synonymous     | CTCF                                                                                                                                                                                                                                                                                                                                                       | 0.357 |
| rs174533 | MYRF intron         | NA                                                                                                                                                                                                                                                                                                                                                         | 0.332 |
| rs102274 | TMEM258 intron      | NA                                                                                                                                                                                                                                                                                                                                                         | 0.332 |
| r174554  | FADS1 intron        | FOS, MYC, STAT3, CEBPB                                                                                                                                                                                                                                                                                                                                     | 0.33  |
| rs174561 | FADS1 intron        | POLR2A, TAF1, TCF12, PML,<br>GATA2, MYC, UBTf, CEBPB, EF300,<br>GATA3, RCOR1, USF2, MAZ, MAX,<br>CCNT2, MXI1, IRF1, SP1, SREBP1,<br>NFYA, E2F4, E2F6, TEAD4, ELK1,<br>CHD2, NR3C1, HMGN3, NFYB,<br>FOXP2, PAX5, CREB1, SMC3,<br>ZKSLAN1, RFX5, TCF7L2, MAFK,<br>JUND, GIF2F1, BRCA1, NRF1,<br>ZBTB7A, ELF1, NF1C, SMARCB1,<br>JUN, EGR1, TBF, SIN3A, FOXA1 | 0.308 |
| rs174562 | FADS2 upstream      | POLR2A, CHD1                                                                                                                                                                                                                                                                                                                                               | 0.33  |
| rs174566 | FADS2 intron        | NA                                                                                                                                                                                                                                                                                                                                                         | 0.372 |
| rs174568 | FADS2 upstream      | NA                                                                                                                                                                                                                                                                                                                                                         | 0.329 |
| rs99780  | FADS2 intron        | POLR2A, CTBF2, TAF1, CTCF, PAX5,<br>WRNIP1                                                                                                                                                                                                                                                                                                                 | 0.408 |
| rs174574 | FADS2 intron        | POLR2A, WRNIP1                                                                                                                                                                                                                                                                                                                                             | 0.462 |
| rs174577 | FADS2 intron        | POLR2A                                                                                                                                                                                                                                                                                                                                                     | 0.41  |
| rs174578 | FADS2 intron        | POLR2A, STAT1, STAT2A                                                                                                                                                                                                                                                                                                                                      | 0.411 |
| rs174583 | FADS2 intron        | POLR2A, RCOR1, SMARCB1,<br>GATA1, HDAC8                                                                                                                                                                                                                                                                                                                    | 0.397 |
| rs174547 | FADS1 intron        | POLR2A                                                                                                                                                                                                                                                                                                                                                     | 0.33  |
| rs174550 | FADS1 intron        | POLR2A                                                                                                                                                                                                                                                                                                                                                     | 0.33  |
| rs174580 | FADS2 intron        | NA                                                                                                                                                                                                                                                                                                                                                         | 0.411 |
| rs174581 | FADS2 intron        | NA                                                                                                                                                                                                                                                                                                                                                         | 0.412 |
| rs174584 | FADS2 intron        | NA                                                                                                                                                                                                                                                                                                                                                         | 0.418 |
| rs174545 | FADS1 3'UTR variant | POLR2A                                                                                                                                                                                                                                                                                                                                                     | 0.33  |



|          |                       |                                                                                                                                                                                                                                                                                              |       |
|----------|-----------------------|----------------------------------------------------------------------------------------------------------------------------------------------------------------------------------------------------------------------------------------------------------------------------------------------|-------|
| rs174538 | TMEM258 5'UTR variant | POLR2A, PML, TAF1, MYC, CHD1, TBP, GATA1, MYB12, MAZ, NFIC, CHD2, HDAC1, E2F1, PAF8, REST, TAF7, RELA, ZBTB7A, YY1, GABPA, MAX< CBX3, UBTF, SIN3A, ELK4, POU2F2, TCF12, KDN5B, ELK1, MXI1, CREB1, NRF1, E2F6, TBL1XR, ELF1, SRF, BCL3, SIX5, SFI1, FOXF2, ETS1, RBBF5, ZNF143, TCF7L2, CEBPB | 0.314 |
| rs174553 | FADS1 intron          | NA                                                                                                                                                                                                                                                                                           | 0.392 |
| rs174541 | Unknown               | POLR2A                                                                                                                                                                                                                                                                                       | 0.339 |
| rs174594 | FADS2 intron          | NA                                                                                                                                                                                                                                                                                           | 0.437 |
| rs174599 | FADS2 intron          | NA                                                                                                                                                                                                                                                                                           | 0.491 |
| rs174601 | FADS2 intron          | STAT1                                                                                                                                                                                                                                                                                        | 0.494 |
| rs174530 | MYRF intron           | NA                                                                                                                                                                                                                                                                                           | 0.343 |
| rs174529 | MYRF intron           | CTCF                                                                                                                                                                                                                                                                                         | 0.372 |
| rs174549 | FADS1 intron          | POL-.4H8                                                                                                                                                                                                                                                                                     | 0.308 |
| rs174555 | FADS1 intron          | NA                                                                                                                                                                                                                                                                                           | 0.308 |
| rs174560 | FADS1 intron          | POL2-4H8                                                                                                                                                                                                                                                                                     | 0.344 |
| rs174592 | FADS2 intron          | NA                                                                                                                                                                                                                                                                                           | 0.477 |
| rs174544 | FADS1 3'UTR variant   | NA                                                                                                                                                                                                                                                                                           | 0.308 |
| rs174548 | FADS1 intron          | NA                                                                                                                                                                                                                                                                                           | 0.344 |
| rs174528 | MYRF intron           | CTCF                                                                                                                                                                                                                                                                                         | 0.449 |
| rs174559 | FADS1 intron          | POL2-4H8                                                                                                                                                                                                                                                                                     | 0.293 |

---

**References:**

Barber MJ, Mangravite LM, Hyde CL, Chasman DI, Smith JD, McCarty CA, et al. Genome-wide association of lipid lowering response to statins in combined study populations. *PLoS One* 2010; 5: e9763.

Bokor S, Dumont J, Spinnekar A, Gonzalez-Gross M, Nova E, Widhalm K, et al. Single nucleotide polymorphisms in the FADS gene cluster are associated with delta-5 and delta-6 desaturase activities estimated by serum fatty acid ratios. *J Lipid Res* 2010; 51: 2325-2333.

Demirkan A, van Duijn CM, Ugocsai P, Isaacs A, Pramstaller PP, Liebisch G, et al. Genome-wide association study identifies novel loci associated with circulating phospho- and sphingolipid concentrations. *PLoS Genet* 2012;8:e1002490.

Devaiah SP, Roth MR, Baughman E, Li M, Tamura P, Jeannotte R, Welti R, et al. Quantitative profiling of polar glycerolipid species from organs of wild-type *Arabidopsis* and a phospholipase *Dalpha1* knockout mutant. *Phytochemistry* 2006; 67:1907-1924.

Dumont J, Huybrechts I, Spinneker A, Gottrand F, Grammatikaki E, Bevilacqua N, et al. FADS1 genetic variability interacts with dietary  $\alpha$ -linolenic acid intake to affect serum non-HDL-cholesterol concentrations in European adolescents. *J Nutr* 2011; 141: 1247-1253.

Franke A, McGovern DP, Barrett JC, Wang K, Radford-Smith GL, Ahmad T, et al. Genome-wide meta-analysis increases to 71 the number of confirmed Crohn's disease

susceptibility loci. *Nat Genet* 2010; 42: 1118-1125.

Harslof LB, Larsen LH, Ritz C, Hellgren LI, Michaelsen KD, Vogel U, et al. FADS genotype and diet are important determinants of DHA status: a cross-sectional study in Danish infants. *Am J Clin Nutr* 2013; 97: 1403-10.

Hicks AA, Pramstaller PP, Johansson A, Vitart V, Rudan I, Ugoicsai P, et al. Genetic determinants of circulating sphingolipid concentrations in European populations. *PLoS Genet* 2009; 5: e1000672.doi:10.1371/journal.pgen.1000672.

Hong SH, Kwak JH, Paik JK, Chae JS, Lee JH. Association of polymorphisms in FADS gene with age-related changes in serum phospholipid polyunsaturated fatty acids and oxidative stress markers in middle-aged nonobese men. *Clin Interv Aging* 2013; 8: 585-596.

Kathiresan S, Willer CJ, Peloso GM, Demissie S, Musunuru K, Schadt EE, et al. Common variants at 30 loci contribute to polygenic dyslipidemia. *Nat Genet* 2009;41:56-65.

Kilaru A, Isaac G, Tamura P, Baxter D, Duncan SR, Venables BJ, Welti R, et al. Lipid profiling reveals tissue-specific differences for ethanolamide lipids in mice lacking fatty acid amide hydrolase. *Lipids* 2010;45:863-875.

Kim OY, Lim HH, Yang LI, Chae JS, Lee JH. Fatty acid desaturase (FADS) gene polymorphisms and insulin resistance in association with serum phospholipid

polyunsaturated fatty acid composition in healthy Korean men: cross-sectional study. *Nutr Metab* 2011; 8: 24.

Kwak JH, Paik JK, Kim OY, Jang Y, Lee SH, Ordovas JM, et al. FADS gene polymorphisms in Koreans: association with  $\omega$ 6 polyunsaturated fatty acids in serum phospholipids, lipid peroxides, and coronary artery disease. *Atherosclerosis* 2011; 214: 94-100.

Lemaitre RN, Tanaka T, Tang W, Manichaikul A, Foy M, Kabagambe EK, et al. Genetic loci associated with plasma phospholipid n-3 fatty acids: a meta-analysis of genome-wide association studies from the CHARGE Consortium. *PLoS Genet* 2011;7:e1002193.

Lettre G, Palmer CD, Young T, Ejebe KG, Allayee H, Benjamin EJ, et al. Genome-wide association study of coronary heart disease and its risk factors in 8,090 African Americans: the NHLBI CARE Project. *PLoS Genet* 2011; 7:e1001300.

Li SW, Lin K, Ma P, Zhang ZL, Zhou YD, Lu SY, et al. FADS gene polymorphisms confer the risk of coronary artery disease in a Chinese Han population through the altered desaturase activities: based on high-resolution melting analysis. *PLoS One* 2013; 8: e55869.

Lu Y, Feskens EJ, Dolle ME, Imholz S, Verschuren WM, Muller M, et al. Dietary n-3 and n-6 polyunsaturated fatty acid intake interacts with FADS1 genetic variation to affect total and HDL-cholesterol concentrations in the Doetinchem Cohort Study. *Am J Clin*

Nutr 2010; 92: 258-265.

Malerba G, Schaeffer L, Xumerle L, Klopp N, Trabetti E, Biscuola M, et al. SNPs of the FADS gene cluster are associated with polyunsaturated fatty acids in a cohort of patients with cardiovascular disease. *Lipids* 2008; 43: 289-299.

Mathias RA, Vergara C, Gao L, Rafaels N, Hand T, Campbell M, Bickel C, et al. FADS genetic variants and omega-6 polyunsaturated fatty acid metabolism in a homogeneous island population. *J Lipid Res* 2010; 51: 2766-74.

Mathias RA, Vergara C, Gao L, Rafaels N, Hand T, Campbell M, et al. FADS genetic variants and omega-6 polyunsaturated fatty acid metabolism in a homogenous island population. *J Lipid Res* 2010; 51: 2766-74.

Molto-Puigmarti C, Jansen E, Heinrich J, Standl M, Mensink RP, Plat J, et al. Genetic variation in FADS genes and plasma cholesterol levels in 2-year-old infants: KOALA Birth Cohort Study. *PLoS One* 2013; 8: e61671.

Morales E, Bustamante M, Gonzalez JR, Guxens M, Torrent M, Mendez M, et al. Genetic variants of the FADS gene cluster and ELOVL gene family, colostrums LC-PUFA levels, breastfeeding, and child cognition. *PLoS One* 2011; 6: e17181.

Purcell S, Neale B, Todd-Brown K, Thomas L, Ferreira MA, Bender D, Maller J, et al. PLINK: a tool set for whole-genome association and population-based linkage analyses. *American Journal of Human Genetics* 2007;81:559-575.

Qin L, Sun L, Ye L, Shi J, Zhou L, Yang J, et al. A case-control study between the gene polymorphisms of polyunsaturated fatty acids metabolic rate-limiting enzymes and coronary artery disease in a Chinese Han population. *Prostaglandins Leukot Essent Fatty Acids* 2011; 85: 329-333.

Romeo S, Kozlitina J, Xing C, Pertsemlidis A, Cox D, Pennacchio LA, Boerwinkle E, et al. Genetic variation in PNPLA3 confers susceptibility to nonalcoholic fatty liver disease. *Nat Genet* 2008;40:1461-1465.

Rzehak P, Thijs C, Standl M, Mommers M, Glaser C, Jansen E, et al. Variants of the FADS1 FADS2 gene cluster, blood levels of polyunsaturated fatty acids and eczema in children within the first 2 years of life. *PLoS One* 2010;5:e13261.

Sabatti C, Service SK, Hartikainen AL, Pouta A, Ripatti S, Brodsky J, et al. Genome-wide association analysis of metabolic traits in a birth cohort from a founder population. *Nat Genet* 2009; 41: 35-46.

Schaeffer L, Gohlke H, Muller M, Heid IM, Palmer LJ, Kompauer I, et al. Common genetic variants of the FADS1 FADS2 gene cluster and their reconstructed haplotypes are associated with the fatty acid composition in phospholipids. *Hum Mol Genet* 2006; 15: 1745-1756.

Schneider CA, Rasband WS, Eliceiri KW. NIH Image to ImageJ: 25 years of image analysis. *Nat Methods* 2012; 9:671-675.

Sergeant S, Hugenschmidt CE, Rudock ME, Ziegler JT, Ivester P, Ainsworth HC, et al. Differences in arachidonic acid levels and fatty acid desaturase (FADS) gene variants in African Americans and European Americans with diabetes or the metabolic syndrome. *Br J Nutr*; 107: 547-555.

Steer CD, Hibbeln JR, Golding J, Davey Smith G. Polyunsaturated fatty acid levels in blood during pregnancy, at birth and at 7 years: their associations with two common FADS2 polymorphisms. *Hum Mol Genet* 2012; 21: 1504-1512.

Tanaka T, Shen J, Abecasis GR, Kisiailiou A, Ordovas JM, Guralnik JM, et al. Genome-wide association study of plasma polyunsaturated fatty acids in the InCHIANTI Study. *PLoS Genet* 2009;5:e1000338.

Teslovich TM, Musunuru K, Smith AV, Edmondson AC, Stylianou IM, Koseki M, et al. Biological, clinical and population relevance of 95 loci for blood lipids. *Nature* 2010; 466: 707-713.

Wang X, Tang H, Teng M, Li Z, Li J, Fan J, Zhong L, Sun X, Xu J, Chen G, Chen D, Wang Z, Xing T, Zhang J, Huang L, Wang S, Peng X, Qin S, Shi Y, Peng Z. Mapping of hepatic expression quantitative trait loci (eQTLs) in a Han Chinese population. *J Med Genet* 2014;51(5):319-26.

Zabaneh D, Balding DJ. A genome-wide association study of the metabolic syndrome in Indian Asian men. *PLoS One* 2010; 5: e11961.

Zhang Z, Tao L, Chen Z, Zhou D, Kan M, Zhang D, et al. Association of genetic loci with blood lipids in the Chinese population. *PLoS One* 2011; 6: e27305.

Zietemann V, Kroger J, Enzenbach C, Jansen E, Fritsche A, Welkert C, et al. Genetic variation of the FADS1 FADS2 gene cluster and n-6 PUFA composition in erythrocyte membranes in the European Prospective Investigation into Cancer and Nutrition-Potsdam Study. *Br J Nutr* 2010; 104: 1748-1759.
